# Supplementary material for: The virulent, emerging genotype B of Deformed wing virus is closely linked to overwinter honeybee worker loss
Source: PubMed Central journal article supplement (PMC5507926; doi:10.1038/s41598-017-05596-3), 2017-07-12
Supplement: 41598_2017_5596_MOESM1_ESM.pdf [file 41598_2017_5596_MOESM1_ESM.pdf]

1 Supplementary information: The virulent, emerging genotype B of  
2 *Deformed wing virus* is closely linked to overwinter honeybee worker loss  
3

4  
5 Myrsini E. Natsopoulou<sup>1,†‡</sup>, Dino P. McMahon<sup>2,3,4,†</sup>, Vincent Doublet<sup>1,5⊠</sup>, Eva Frey<sup>6</sup>, Peter  
6 Rosenkranz<sup>6</sup>, Robert J. Paxton<sup>1,2,5</sup>  
7  
8  
9

10 <sup>1</sup> Institute for Biology, Martin-Luther-University Halle-Wittenberg, Hoher Weg 8, 06120 Halle (Saale), Germany

11 <sup>2</sup> School of Biological Sciences, MBC, Queen's University Belfast, Belfast BT9 7BL, UK

12 <sup>3</sup> Institute of Biology, Free University Berlin, Schwendenerstr. 1, 14195 Berlin, Germany

13 <sup>4</sup> Department for Materials and Environment, BAM Federal Institute for Materials Research and Testing, Unter den  
14 Eichen 87, 12205 Berlin, Germany

15 <sup>5</sup> German Centre for Integrative Biodiversity Research Halle-Jena-Leipzig (iDiv), Deutscher Platz 5e, 04103 Leipzig,  
16 Germany

17 <sup>6</sup> Apicultural State Institute, University of Hohenheim, 70599 Stuttgart, Germany  
18

19 †These authors contributed equally  
20

21 ‡Current address: Section for Organismal Biology, Department of Plant and Environmental  
22 Sciences, University of Copenhagen, Denmark  
23

24 ⊠ Current address: Centre for Ecology and Conservation, University of Exeter, Penryn, UK  
25

**Table S1.** Virus and host housekeeping gene (beta-Actin) presence/absence (MLPA) from pooled samples.

| Colony | DWV complex |        | BQCV   |        | CBPV   |        | Actin  |        |
|--------|-------------|--------|--------|--------|--------|--------|--------|--------|
|        | Autumn      | Spring | Autumn | Spring | Autumn | Spring | Autumn | Spring |
| cs1    | 0           | 0      | 1      | 1      | 0      | 0      | 1      | 1      |
| cs2    | 1           | 0      | 0      | 0      | 0      | 0      | 1      | 1      |
| cs3    | 1           | 0      | 0      | 0      | 0      | 0      | 1      | 1      |
| cs4    | 1           | 0      | 0      | 0      | 0      | 0      | 1      | 1      |
| cs5    | 1           | 0      | 0      | 1      | 0      | 0      | 1      | 1      |
| cs6    | 1           | 0      | 0      | 1      | 0      | 0      | 1      | 1      |
| cs7    | 1           | 0      | 1      | 0      | 0      | 0      | 1      | 1      |
| ck1    | 1           | 0      | 0      | 0      | 0      | 0      | 1      | 1      |
| ck2    | 1           | 0      | 0      | 0      | 0      | 0      | 1      | 1      |
| ck3    | 1           | 1      | 1      | 0      | 0      | 0      | 1      | 1      |
| ck4    | 1           | 0      | 0      | 1      | 0      | 0      | 1      | 1      |
| ck5    | 1           | 0      | 0      | 0      | 1      | 0      | 1      | 1      |
| ck6    | 1           | 0      | 0      | 0      | 0      | 0      | 1      | 1      |
| ck7    | 1           | 1      | 0      | 0      | 0      | 0      | 1      | 1      |
| ts1    | 1           | 0      | 0      | 1      | 1      | 0      | 1      | 1      |
| ts2    | 1           | 0      | 0      | 0      | 1      | 0      | 1      | 1      |
| ts3    | 1           | 0      | 0      | 0      | 0      | 0      | 1      | 1      |
| ts4    | 1           | 0      | 0      | 0      | 0      | 0      | 1      | 1      |
| ts5    | 1           | 0      | 0      | 0      | 0      | 0      | 1      | 1      |
| ts6    | 1           | 0      | 0      | 0      | 0      | 1      | 1      | 1      |
| ts7    | 1           | 0      | 0      | 0      | 0      | 0      | 1      | 1      |
| tk1    | 1           | 0      | 0      | 0      | 0      | 0      | 1      | 1      |
| tk2    | 1           | 0      | 0      | 0      | 0      | 0      | 1      | 1      |
| tk3    | 1           | 0      | 0      | 1      | 0      | 0      | 1      | 1      |
| tk4    | 0           | 0      | 1      | 1      | 0      | 0      | 1      | 1      |
| tk5    | 1           | 0      | 0      | 1      | 0      | 0      | 1      | 1      |
| tk6    | 1           | 0      | 0      | 0      | 0      | 0      | 1      | 1      |
| tk7    | 1           | 0      | 0      | 0      | 0      | 0      | 1      | 1      |

**Table S2. A.** Virus loads (qRT-PCR) from pooled samples as Ct values for viruses detected by MLPA (see Table S1). **B.** Ct values transformed into virus genome equivalents, averaged per bee, for those two viruses with Ct < 35, along with the normalized values relative to the absolute quantity of the host housekeeping gene RP49. **C.** Overwinter worker mortality (%) along with viral and *Nosema* spp. prevalence per colony. Pathogen prevalence was based on 15 individuals per colony while *V. destructor* infestation was estimated on a sample of 150 individuals per colony.

A.

| Colony | DWV-B (RdRp) |        | DWV-B (Lp)   |              | DWV-A (RdRp) |              | DWV-A (Lp) |        | BQCV (Cp)    |              | RP49   |        |
|--------|--------------|--------|--------------|--------------|--------------|--------------|------------|--------|--------------|--------------|--------|--------|
|        | Autumn       | Spring | Autumn       | Spring       | Autumn       | Spring       | Autumn     | Spring | Autumn       | Spring       | Autumn | Spring |
| cs1    | 34.79        | na     | na           | na           | <b>39.02</b> | <b>36.41</b> | na         | na     | 32.73        | 33.02        | 35.96  | 34.43  |
| cs2    | 22.06        | na     | 33.76        | na           | <b>38.15</b> | na           | na         | na     | <b>35.66</b> | <b>38.45</b> | 31.48  | 30.14  |
| cs3    | 19.21        | na     | 28.44        | na           | <b>38.69</b> | na           | na         | na     | 35.35        | na           | 34.08  | 31.97  |
| cs4    | 22.03        | na     | 35.02        | na           | <b>36.43</b> | na           | na         | na     | <b>37.47</b> | na           | 34.72  | 29.47  |
| cs5    | 28.39        | na     | <b>39.59</b> | na           | <b>38.14</b> | na           | na         | na     | <b>36.00</b> | <b>37.12</b> | 32.83  | 27.96  |
| cs6    | 17.19        | na     | 29.17        | na           | <b>38.78</b> | <b>39.18</b> | na         | na     | 32.51        | na           | 34.61  | 35.76  |
| cs7    | 22.01        | na     | 32.21        | na           | <b>38.34</b> | na           | na         | na     | 19.38        | na           | 28.04  | 28.90  |
| ck1    | 21.21        | 34.04  | 31.07        | na           | <b>36.34</b> | na           | na         | na     | 32.22        | na           | 29.46  | 32.16  |
| ck2    | 20.13        | 32.14  | 28.90        | na           | <b>37.68</b> | <b>38.25</b> | na         | na     | 31.16        | <b>38.80</b> | 28.45  | 30.95  |
| ck3    | 19.87        | 20.24  | 28.78        | 32.77        | na           | <b>38.81</b> | na         | na     | 28.13        | 34.40        | 33.46  | 28.18  |
| ck4    | 23.06        | 34.57  | 32.00        | na           | <b>38.35</b> | na           | na         | na     | 33.49        | 33.22        | 30.79  | 30.84  |
| ck5    | 20.45        | 28.82  | 35.48        | na           | <b>37.52</b> | na           | na         | na     | 31.24        | <b>38.74</b> | 32.49  | 31.78  |
| ck6    | 21.09        | na     | 31.19        | na           | na           | na           | na         | na     | <b>36.20</b> | <b>38.34</b> | 34.76  | 32.62  |
| ck7    | 26.34        | na     | 34.98        | <b>38.53</b> | na           | na           | na         | na     | 31.45        | <b>38.92</b> | 33.04  | 29.57  |
| ts1    | 30.12        | na     | 33.03        | na           | <b>37.60</b> | na           | na         | na     | 35.21        | na           | 30.31  | 34.30  |
| ts2    | 29.67        | na     | <b>36.63</b> | na           | <b>37.13</b> | na           | na         | na     | 34.79        | na           | 31.03  | 33.99  |
| ts3    | 22.5         | na     | 30.73        | na           | na           | na           | na         | na     | <b>36.56</b> | na           | 33.03  | 32.69  |
| ts4    | 22.94        | na     | 31.57        | na           | na           | <b>35.55</b> | na         | na     | 34.93        | <b>38.17</b> | 33.51  | 32.61  |
| ts5    | 20.78        | na     | 27.78        | na           | <b>37.50</b> | na           | na         | na     | <b>35.59</b> | na           | 34.22  | 35.49  |
| ts6    | 18.44        | na     | 28.53        | na           | <b>36.02</b> | <b>36.28</b> | na         | na     | 35.40        | na           | 30     | 35.34  |
| ts7    | 21.54        | na     | 29.51        | na           | <b>37.35</b> | na           | na         | na     | 30.93        | na           | 28.1   | 33.31  |
| tk1    | 20.6         | na     | 28.39        | na           | na           | na           | na         | na     | 27.20        | <b>37.79</b> | 34.45  | 31.03  |
| tk2    | 22.7         | na     | 31.81        | na           | na           | <b>35.62</b> | na         | na     | 32.92        | na           | 33.2   | 30.79  |
| tk3    | 18.75        | na     | 28.82        | na           | <b>37.79</b> | na           | na         | na     | 32.15        | <b>35.75</b> | 30.46  | 33.88  |
| tk4    | <b>35.79</b> | na     | na           | na           | <b>36.79</b> | na           | na         | na     | 27.65        | 34.68        | 31.57  | 31.69  |
| tk5    | 20.81        | na     | 30.44        | na           | <b>39.10</b> | na           | na         | na     | 29.81        | 33.84        | 34.5   | 32.30  |
| tk6    | 21.02        | 34.47  | 29.82        | na           | <b>37.43</b> | <b>38.68</b> | na         | na     | 31.83        | <b>37.96</b> | 34.2   | 32.17  |
| tk7    | 21.24        | na     | 30.05        | na           | na           | na           | na         | na     | 33.27        | na           | 32.97  | 32.95  |

c = control treated; t = pesticide treated; s = Simonswald; k = Kenzingen. Bold/italic Ct values > acceptance threshold (Ct = 35). na = not detected; RdRp = RNA-dependent RNA polymerase; Lp = Leader polypeptide; Cp = Capsid protein

**Table S2.** Cont.

**B.**

| Colony | DWV-B (RdRp) |        | BQCV (Cp) |        | DWV-B (RdRp)<br>Normalized to RP49 |             | BQCV (Cp)<br>Normalized to RP49 |         |
|--------|--------------|--------|-----------|--------|------------------------------------|-------------|---------------------------------|---------|
|        | Autumn       | Spring | Autumn    | Spring | Autumn                             | Spring      | Autumn                          | Spring  |
| cs1    | 301358       |        | 2E+06     | 2E+06  | 0.004509128                        |             | 0.06355                         | 0.01954 |
| cs2    | 5E+08        |        |           |        | 0.896240745                        |             |                                 |         |
| cs3    | 9E+09        |        | 335537    |        | 29.86662299                        |             | 0.00319                         |         |
| cs4    | 1E+09        |        |           |        | 7.35743038                         |             |                                 |         |
| cs5    | 8E+06        |        |           |        | 0.036566367                        |             |                                 |         |
| cs6    | 1E+10        |        | 1E+06     |        | 153.2693408                        |             | 0.03099                         |         |
| cs7    | 2E+09        |        | 2E+10     |        | 0.101596447                        |             | 3.37688                         |         |
| ck1    | 2E+09        | 31858  | 3E+06     |        | 0.422940383                        | 1.54068E-05 | 0.00137                         |         |
| ck2    | 2E+09        | 116216 | 3E+06     |        | 0.442219063                        | 2.98097E-05 | 0.00148                         |         |
| ck3    | 1E+10        | 3E+08  | 8E+07     | 428361 | 13.13280105                        | 2.667018767 | 0.28887                         | 0.00014 |
| ck4    | 8E+08        | 21225  | 1E+06     | 2E+06  | 0.304060351                        | 2.63357E-05 | 0.00136                         | 0.00169 |
| ck5    | 4E+09        | 908275 | 6E+06     |        | 4.839704616                        | 0.004003648 | 0.01873                         |         |
| ck6    | 2E+09        |        |           |        | 13.82242841                        |             |                                 |         |
| ck7    | 8E+07        |        | 4E+06     |        | 0.156514321                        |             | 0.02309                         |         |
| ts1    | 8E+06        |        | 370572    |        | 0.002384866                        |             | 0.00031                         |         |
| ts2    | 5E+06        |        | 253119    |        | 0.00506875                         |             | 0.00066                         |         |
| ts3    | 1E+09        |        |           |        | 1.834678945                        |             |                                 |         |
| ts4    | 8E+08        |        | 455627    |        | 1.879646072                        |             | 0.00295                         |         |
| ts5    | 3E+09        |        |           |        | 11.90782037                        |             |                                 |         |
| ts6    | 1E+10        |        | 304670    |        | 3.546638523                        |             | 0.00022                         |         |
| ts7    | 1E+09        |        | 4E+06     |        | 0.142624919                        |             | 0.00138                         |         |
| tk1    | 3E+09        |        | 9E+07     |        | 15.50489468                        |             | 1.02962                         |         |
| tk2    | 1E+09        |        | 2E+06     |        | 1.803011696                        |             | 0.00947                         |         |
| tk3    | 1E+10        |        | 3E+06     |        | 3.914529268                        |             | 0.00274                         |         |
| tk4    |              |        | 6E+07     | 850053 |                                    |             | 0.11841                         | 0.00108 |
| tk5    | 3E+09        |        | 1E+07     | 1E+06  | 13.98768012                        |             | 0.18009                         | 0.00285 |
| tk6    | 3E+09        | 20489  | 4E+06     |        | 10.06830247                        | 0.000282625 | 0.03783                         |         |
| tk7    | 2E+09        |        | 1E+06     |        | 3.967555442                        |             | 0.00642                         |         |

**Table S2.** Cont.  
C.

| Colony | overwinter worker mortality (%) | Varroa infestation (%) | DWV-B prevalence (%) | BQCV prevalence (%) | CBPV prevalence (%) | <i>N. ceranae</i> prevalence (%) | <i>N. apis</i> prevalence (%) |
|--------|---------------------------------|------------------------|----------------------|---------------------|---------------------|----------------------------------|-------------------------------|
|        |                                 | Autumn                 | Autumn               | Autumn              | Autumn              | Autumn                           | Autumn                        |
| cs1    | 43.66                           | 5.3                    | 6.7                  | 6.7                 | 0                   | 0                                | 0                             |
| cs2    | 6.51                            | 3.8                    | 6.7                  | 26.7                | 0                   | 0                                | 0                             |
| cs3    | 34.78                           | 2.2                    | 33.3                 | 40                  | 0                   | 6.7                              | 0                             |
| cs4    | 52.93                           | 6.2                    | 40                   | 20                  | 6.7                 | 0                                | 0                             |
| cs5    | 45.47                           | 2.8                    | 60                   | 0                   | 0                   | 0                                | 0                             |
| cs6    | 13.08                           | 8.9                    | 6.7                  | 0                   | 6.7                 | 0                                | 0                             |
| cs7    | 40.55                           | 0.5                    | 13.3                 | 0                   | 6.7                 | 0                                | 0                             |
| ck1    | 55.57                           | 31.6                   | 73.3                 | 26.7                | 0                   | 6.7                              | 0                             |
| ck2    | 55.6                            | 20                     | 26.7                 | 13.3                | 0                   | 0                                | 0                             |
| ck3    | 52.38                           | 4.1                    | 20                   | 13.3                | 0                   | 6.7                              | 0                             |
| ck4    | 72.9                            | 20.2                   | 13.3                 | 13.3                | 0                   | 0                                | 0                             |
| ck5    | 55.75                           | 10.8                   | 33.3                 | 26.7                | 6.7                 | 0                                | 0                             |
| ck6    | 51.9                            | 28.5                   | 40                   | 40                  | 0                   | 13.3                             | 0                             |
| ck7    | 63.9                            | 10.7                   | 6.7                  | 26.7                | 6.7                 | 0                                | 0                             |
| ts1    | 22.91                           | 0                      | 6.7                  | 0                   | 6.7                 | 6.7                              | 6.7                           |
| ts2    | 33.67                           | 0                      | 20                   | 20                  | 13.3                | 0                                | 0                             |
| ts3    | 32.34                           | 0                      | 13.3                 | 0                   | 13.3                | 6.7                              | 0                             |
| ts4    | 74.38                           | 0.4                    | 13.3                 | 0                   | 0                   | 0                                | 0                             |
| ts5    | 59.92                           | 0                      | 60                   | 6.7                 | 0                   | 0                                | 0                             |
| ts6    | 36.54                           | 0                      | 26.7                 | 6.7                 | 0                   | 0                                | 0                             |
| ts7    | 37.91                           | 0                      | 6.7                  | 0                   | 0                   | 0                                | 0                             |
| tk1    | 25.17                           | 0                      | 40                   | 40                  | 0                   | 6.7                              | 0                             |
| tk2    | 17.79                           | 0                      | 6.7                  | 13.3                | 0                   | 0                                | 0                             |
| tk3    | 25.09                           | 0                      | 6.7                  | 53.3                | 0                   | 0                                | 0                             |
| tk4    | 22.68                           | 0                      | 0                    | 20                  | 0                   | 0                                | 0                             |
| tk5    | 39.06                           | 0                      | 6.7                  | 40                  | 0                   | 0                                | 0                             |
| tk6    | 29.82                           | 0                      | 0                    | 40                  | 0                   | 0                                | 6.7                           |
| tk7    | 10                              | 1.2                    | 0                    | 13.3                | 0                   | 0                                | 0                             |

**Table S3.** Genome of origin for Illumina sequence reads from the DWV-B field extract (from McMahon et al.<sup>1</sup>).

| Origin         | DWV-B reads        |
|----------------|--------------------|
| <i>Apis</i>    | 15,276,447 (74.5%) |
| Viruses        |                    |
| DWV-B          | 4,547,491 (22.2%)  |
| DWV-A          | 6,157 (0.03%)      |
| Bacteria       |                    |
|                | 1,011 (0.0049%)    |
| Overhead       |                    |
| phiX           | 26,355 (0.13%)     |
| sequencing     |                    |
| adapters       | 3,555 (0.017%)     |
| low complexity | 602,276 (2.9%)     |
| Unknown        | 47,587 (0.23%)     |
| Total          | 20,510,879         |

**Table S4.** Primers used in this study. The position of DWV-A and DWV-B primers across the genome are indicated in brackets (Accession number in Genbank: DWV-A ref: NC\_004830; DWV-B ref: NC\_006494). Minimum detection limit is based upon standard curves of viral dilutions run simultaneously with the samples.

| Primer            | Target | Name       | Sequence                  | Application | Amplicon size (bp)     | Reference         | Minimum detection limit (ct=35) in viral genome equivalents per reaction |
|-------------------|--------|------------|---------------------------|-------------|------------------------|-------------------|--------------------------------------------------------------------------|
| DWV-A (Lp)        |        | DWV-F1425  | CGTCGGCCTATCAAAG          | qPCR        | 417                    | [2]               | ~1.7x 10 <sup>3</sup>                                                    |
| DWV-A (Lp)        |        | DWV-B1806  | CTTTTCTAATTCAACTTCACC     | qPCR        | position[1415...1831]  | "                 |                                                                          |
| DWV-B (Lp)        |        | VDV1-F1409 | GCCCTGTTCAAGAACATG        | qPCR        | 413                    | "                 | ~1.5x10 <sup>3</sup>                                                     |
| DWV-B (Lp)        |        | DWV-B1806  | CTTTTCTAATTCAACTTCACC     | qPCR        | position [1392...1804] | "                 |                                                                          |
| DWV-A (RdRp)      |        | DWV-F2     | TGTCTTCATTAAAGCCACCTGGAA  | qPCR        | 140                    | [1]               | ~4.9                                                                     |
| DWV-A (RdRp)      |        | DWV-R2a    | TTTCCTCATTAACTGTGTCGTTGAT | qPCR        | position [8646...8785] | "                 |                                                                          |
| DWV-B (RdRp)      |        | VDV-F2     | TATCTTCATTAAAACCGCCAGGCT  | qPCR        | 140                    | "                 | ~11.33                                                                   |
| DWV-B (RdRp)      |        | VDV-R2a    | CTTCCTCATTAACTGAGTTGTTGTC | qPCR        | position [8619...8758] | "                 |                                                                          |
| BQCV              |        | BQCV-F7893 | AGTGCGGAGATGTATGC         | qPCR        | 294                    | [2]               | ~3x10 <sup>2</sup>                                                       |
| BQCV              |        | BQCV-B8150 | GGAGGTGAAGTGGCTATATC      | qPCR        |                        | "                 |                                                                          |
| RP49              |        | RP49-qF    | AAGTTCATTCGTCACCAGAG      | qPCR        | 205                    | [3]               | ~3.3x10 <sup>4</sup>                                                     |
| RP49              |        | RP49-qB    | CTTCCAGTTCCTTGACATTATG    | qPCR        |                        | "                 |                                                                          |
| <i>N. ceranae</i> |        | Ncer-F     | CAATATTTTATTATTTTGAGAGA   | RT-PCR      | 232                    | [4]               | NA                                                                       |
| <i>N. ceranae</i> |        | Ncer-R     | TATATTTATTGTATTGCGCGTGCA  | RT-PCR      |                        | "                 |                                                                          |
| <i>N. apis</i>    |        | Napis-F    | CAATATTTTATTGTTCTGCGAGG   | RT-PCR      | 208                    | "                 | NA                                                                       |
| <i>N. apis</i>    |        | Napis-R    | AAAGTCTATTGTATTGCGCGTGCT  | RT-PCR      |                        | modified from [4] |                                                                          |

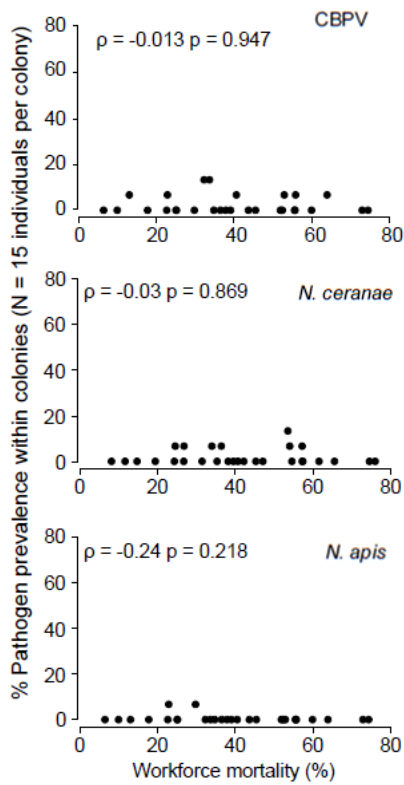

**Figure S1.** Relationship between CBPV, *N. ceranae* and *N. apis* prevalence within colonies in autumn (estimated from 15 individually screened honeybees) and overwinter mortality. Spearman's  $\rho$  and significance levels are shown.

#### References

1. McMahon, D. P. *et al.* Elevated virulence of an emerging viral genotype as a driver of honeybee loss. *Proc. R. Soc. B Biol. Sci.* (2016). doi:10.1098/rspb.2016.0811
2. Locke, B., Forsgren, E., Fries, I. & de Miranda, J. R. Acaricide treatment affects viral dynamics in *Varroa destructor*-infested honey bee colonies via both host physiology and mite control. *Appl. Environ. Microbiol.* **78**, 227–235 (2012).
3. Yañez, O. *et al.* Deformed wing virus and drone mating flights in the honey bee (*Apis mellifera*): Implications for sexual transmission of a major honey bee virus. *Apidologie* **43**, 17–30 (2012).
4. VanEngelsdorp, D. *et al.* Colony collapse disorder: a descriptive study. *PLoS One* **4**, e6481 (2009).
